# Supplementary material for: Hydrothermal synthesis of crystalline rectangular titanoniobate particles
Source: Royal Society of Chemistry journal article supplement (doi:10.1039/b418002j), 2005-01-01
Supplement: b418002j.pdf [file b418002j.pdf]

ESI:

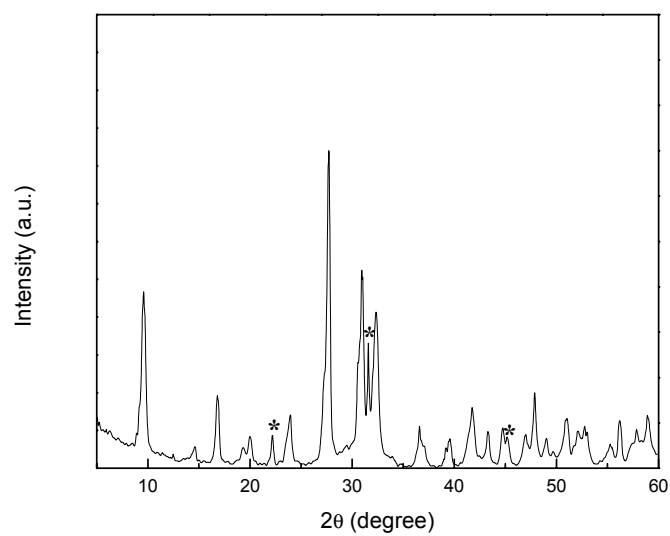

(a) XRD pattern of hydrothermally prepared sample 400-0.5-8.  
The stars mark the diffraction peaks of contaminant phase ( $\text{KNbO}_3$ ) besides of  $\text{KTiNbO}_5$

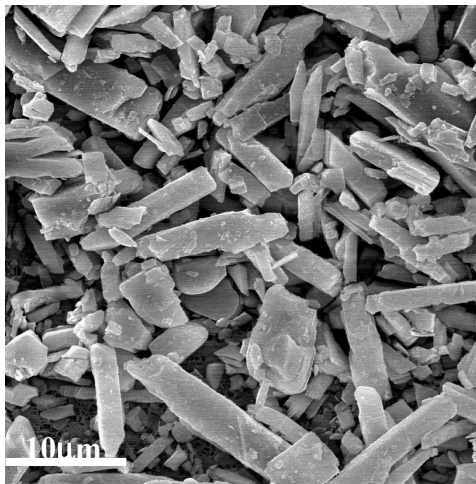

(b) SEM image of KTiNbO<sub>5</sub> particles prepared by solid-state method

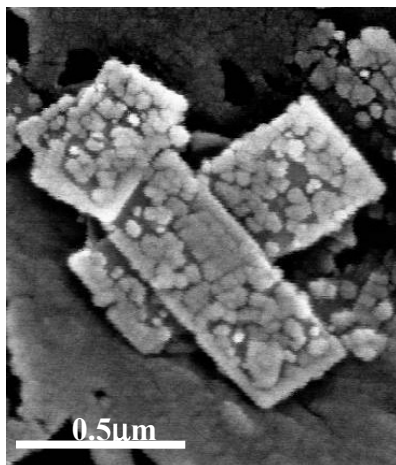

(c) SEM image of sample 400-0.5-2. The rectangle particles have the size in the range of several hundreds nanometers, attaching by small particles on the surface.
